# Supplementary material for: Terminal ruthenium carbido complexes as σ-donor ligands
Source: Royal Society of Chemistry journal article supplement (doi:10.1039/b207903h), 2002-01-01
Supplement: b207903h.doc [file b207903h.doc]

Terminal ruthenium carbido complexes as -donor ligands

Supplemental Information

Andrew Hejl, Tina M. Trnka, Michael W. Day and Robert H. Grubbs*

Arnold and Mabel Beckman Laboratory of Chemical Synthesis, Division of Chemistry and Chemical Engineering, California Institute of Technology, Pasadena, CA 91125, USA

E-mail: rhg@its.caltech.edu

**Special Refinement Details for the structure of (PCy3)2(Cl)2RuC (2):**

The crystals contain benzene as a solvent of crystallization, and there appears to be no disorder. However, non-merohedral twinning is present in the samples. Visual inspection of the data frames suggests the possibility of twinning and viewing of the file containing reflections for unit cell determination using the reciprocal lattice viewer Rlatt clearly indicates a second lattice is present. It was not possible to obtain reliable integrated intensities for each twin component. Therefore, the orientation of the major component was used as a matrix for integrating intensities and the sample was treated as a single crystal in all subsequent operations. Consequently the list of largest ∆F2/esd is composed of reflections where F2(obs) is larger than F2(calc) without exception for more than the first 100 reflections. The largest value for F2/esd is ~75 and the values fall rapidly within the first six reflections to ~30 then gradually decrease. An additional consequence is the large residual electron density found in the final difference Fourier.

All hydrogen atoms were restrained to geometric positions and refined as riding atoms. The electron density map containing heavy atoms only evidenced many hydrogen atoms. There was no evidence for a hydrogen atom bonded to the carbido carbon C(1).
